# Supplementary material for: Disconnected: What Can We Learn from Individuals with Very Low Nature Connection?
Source: Int J Environ Res Public Health. 2022 Jun 30;19(13):8021. doi: 10.3390/ijerph19138021 (PMC9266168; doi:10.3390/ijerph19138021)
Supplement: Supplementary file 1 [file ijerph-19-08021-s001.zip › ijerph-1764468-supplementary.pdf]

## Supplementary Materials

Overall regression table

**Table S1.** Logistic regression model predicting nature disconnect as a function of demographics and social characteristics/behaviours from MENE dataset. Odd's ratios indicate odds of being disconnected.  $N = 4735$ ,  $\chi^2 = 291.46$ ,  $p < 0.001$ , McFadden's pseudo  $R^2 = 0.14$ . Multicollinearity was deemed to be low as using the generalized variance-inflation factor approach for categorical predictors  $GVIF^{(1/(2 \times df))}$ , which when squared produced values ranging from 1.07–1.94.

|                                             | Nature disconnect |       |                   |         |        |
|---------------------------------------------|-------------------|-------|-------------------|---------|--------|
|                                             | Beta              | OR    | 95% CI OR         | z value | p      |
| <b>Age</b>                                  |                   |       |                   |         |        |
| 16-24 (reference)                           | -                 | -     | - -               | -       | -      |
| 25-34                                       | -0.363            | 0.696 | [ 0.454 - 1.068 ] | -1.666  | 0.096  |
| 35-44                                       | -0.669            | 0.512 | [ 0.312 - 0.834 ] | -2.675  | 0.007  |
| 45-54                                       | -0.637            | 0.529 | [ 0.320 - 0.868 ] | -2.509  | 0.012  |
| 55-64                                       | -0.782            | 0.457 | [ 0.260 - 0.791 ] | -2.761  | 0.006  |
| 65+                                         | -0.683            | 0.505 | [ 0.233 - 1.087 ] | -1.739  | 0.082  |
| <b>Sex</b>                                  |                   |       |                   |         |        |
| Sex (Male)                                  | 0.291             | 1.337 | [ 1.039 - 1.725 ] | 2.247   | 0.025  |
| <b>Marital Status</b>                       |                   |       |                   |         |        |
| Married (reference)                         | -                 | -     | - -               | -       | -      |
| Sep/Wid/div                                 | -0.097            | 0.908 | [ 0.602 - 1.349 ] | -0.472  | 0.637  |
| Single                                      | 0.310             | 1.363 | [ 1.004 - 1.846 ] | 1.994   | 0.046  |
| <b>Working status</b>                       |                   |       |                   |         |        |
| Full time (reference)                       | -                 | -     | - -               | -       | -      |
| In Education                                | 0.218             | 1.244 | [ 0.745 - 2.061 ] | 0.843   | 0.399  |
| Not working                                 | 0.107             | 1.113 | [ 0.742 - 1.656 ] | 0.523   | 0.601  |
| Part time                                   | -0.034            | 0.966 | [ 0.619 - 1.477 ] | -0.156  | 0.876  |
| Retired                                     | 0.325             | 1.384 | [ 0.687 - 2.778 ] | 0.910   | 0.363  |
| <b>Socioeconomic group</b>                  |                   |       |                   |         |        |
| A (Reference)                               | -                 | -     | - -               | -       | -      |
| B                                           | -0.324            | 0.723 | [ 0.318 - 1.872 ] | -0.727  | 0.467  |
| C1                                          | -0.597            | 0.551 | [ 0.250 - 1.397 ] | -1.378  | 0.168  |
| C2                                          | -0.783            | 0.457 | [ 0.205 - 1.167 ] | -1.789  | 0.074  |
| D                                           | -0.632            | 0.532 | [ 0.237 - 1.362 ] | -1.437  | 0.151  |
| E                                           | -0.581            | 0.560 | [ 0.246 - 1.451 ] | -1.299  | 0.194  |
| <b>Tenure</b>                               |                   |       |                   |         |        |
| Owned outright (reference)                  | -                 | -     | - -               | -       | -      |
| Mortgage                                    | 0.433             | 1.543 | [ 1.001 - 2.380 ] | 1.597   | 0.110  |
| Rent private                                | 0.170             | 1.186 | [ 0.783 - 1.801 ] | -0.156  | 0.876  |
| Rent local authority                        | 0.372             | 1.451 | [ 0.984 - 2.149 ] | 2.979   | 0.003  |
| Other                                       | 0.076             | 1.079 | [ 0.501 - 2.148 ] | 0.809   | 0.419  |
| <b>Mean Deprivation</b>                     |                   |       |                   |         |        |
| First quartile - least deprived (reference) | -                 | -     | - -               | -       | -      |
| Second quartile                             | 0.245             | 1.277 | [ 0.853 - 1.931 ] | 1.177   | 0.239  |
| Third quartile                              | 0.321             | 1.379 | [ 0.925 - 2.080 ] | 1.557   | 0.120  |
| Forth quartile - most deprived              | 0.479             | 1.615 | [ 1.083 - 2.441 ] | 2.317   | 0.021  |
| <b>Wellbeing</b>                            |                   |       |                   |         |        |
| Overall life satisfaction                   | -0.098            | 0.906 | [ 0.857 - 0.959 ] | -3.461  | 0.001  |
| <b>Pro-environmental behaviours</b>         |                   |       |                   |         |        |
| Qe4 sum                                     | -0.589            | 0.555 | [ 0.498 - 0.616 ] | -10.876 | <0.001 |
| (Intercept)                                 | -0.713            | 0.490 | [ 0.156 - 1.405 ] | -1.283  | 0.200  |

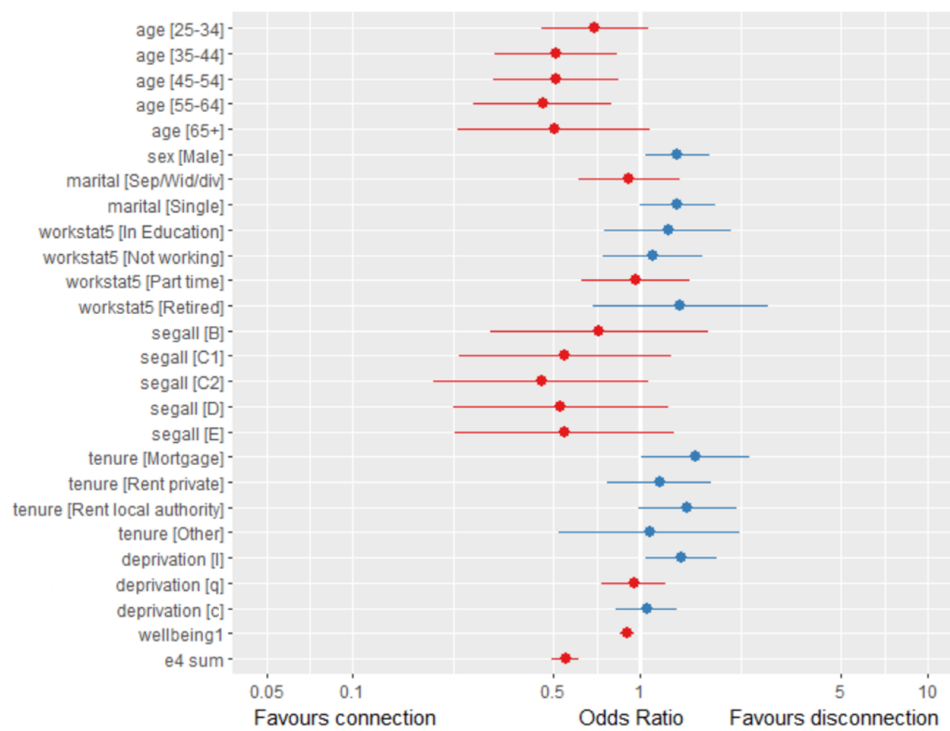

**Figure S1.** Forest plot of odds ratios from GLM of predictors of disconnection. Values to the right of the centre line (odd's ratio of 1) indicate that disconnection is favoured, values to the left indicate connection is favoured.
